# Supplementary material for: Nitrogen addition increases the contents of glomalin-related soil protein and soil organic carbon but retains aggregate stability in a Pinus tabulaeformis forest
Source: PeerJ. 2018 Jun 25;6:e5039. doi: 10.7717/peerj.5039 (PMC6034158; doi:10.7717/peerj.5039)
Supplement: Supplemental Information 1 [file peerj-06-5039-s001.xlsx]

## Sheet: GRSP
Treatment	macro-aggregate		micro-aggregate		clay-silt
(g N m-2 y-1)	EE-GRSP	T-GRSP	EE-GRSP	T-GRSP	EE-GRSP	T-GRSP	mg/g
CK(0)	0.24636	0.984672	0.214028	1.36799	0.3228	1.7296
	0.230664	0.226512	0.19794	1.31669	0.17352	1.0912
	0.089792	0.282768	0.18794	1.3909	0.24856	1.21936
	0.110608	0.285888	0.234292	0.702672	0.23856	1.3216
	0.114944	0.273792	0.270812	0.702672	0.26368	1.3216
	0.098672	0.206208	0.178644	0.675312	0.25352	1.4728
N3(3)	0.182072	0.84096	0.50362	1.20499	0.34288	1.3216
	0.289696	2.52085	0.159928	3.39714	0.31728	1.64704
	0.239536	1.78463	0.164	3.3296	0.35464	1.51984
	0.403536	1.93763	0.224096	3.49551	0.33136	1.44208
	0.328768	2.45334	0.383184	3.65569	0.36672	1.51984
	0.27428	2.06043	0.26132	3.57455	0.34288	1.5832
N6(6)	0.55652	1.96635	0.182192	3.93795	0.36072	1.48864
	0.477752	1.95414	0.144128	3.44526	0.3116	1.44208
	0.448904	2.93096	0.202424	3.4826	0.28192	1.76368
	0.393	2.60559	0.08164	3.77351	0.30064	1.44208
	0.57244	2.71837	0.068952	4.23246	0.26368	1.50448
	0.432504	2.28025	0.205536	3.71387	0.3228	1.68064
N9(9)	0.11372	3.22187	0.1974	3.51851	0.28192	1.30672
	0.091936	3.09687	0.23008	3.82019	0.33432	1.51984
	0.104744	3.64995	0.240496	3.55657	0.3884	1.38112
	0.110728	4.01771	0.357328	3.5889	0.36072	1.35136
	0.127848	3.83454	0.331832	3.56807	0.35464	1.24768
	0.121864	4.17428	0.205656	3.65497	0.37904	1.3216

## Sheet: aggregate
Treatment	macro-aggregate	micro-aggregate	clay	silt					MWD		GMD
N0	0.641096	0.27287	0.0846223	0.00141169		0.641096	0.27287	0.086034	1.40554	1.451	-0.149577	0.861072	0.861072	0.897789
N0	0.689437	0.246172	0.0627778	0.00161349		0.689437	0.246172	0.0643913	1.50369		-0.0775143	0.925414	0.925414
N0	0.607615	0.323971	0.0668222	0.00159124		0.607615	0.323971	0.0684134	1.34159		-0.174927	0.839519	0.839519
N0	0.700056	0.230538	0.06802	0.0013862		0.700056	0.230538	0.0694062	1.52404		-0.0690423	0.933287	0.933287
N0	0.693418	0.231796	0.0733296	0.00145664		0.693418	0.231796	0.0747863	1.51026		-0.0807514	0.922423	0.922423
N0	0.649901	0.25384	0.0645761	0.0016836		0.649901	0.25384	0.0662597	1.42087		-0.0997985	0.90502	0.90502
N3	0.749915	0.198557	0.0498186	0.00170886		0.749915	0.198557	0.0515274	1.62472	1.50181	0.00193845	1.00194	1.00194	0.935278
N3	0.687568	0.264073	0.0467201	0.00163939		0.687568	0.264073	0.0483595	1.50197		-0.0675951	0.934639	0.934639
N3	0.761107	0.186803	0.0504095	0.00168031		0.761107	0.186803	0.0520898	1.64675		0.0144248	1.01453	1.01453
N3	0.542931	0.390554	0.0648477	0.00166774		0.542931	0.390554	0.0665154	1.21407		-0.248112	0.780272	0.780272
N3	0.664138	0.283886	0.0506683	0.00130701		0.664138	0.283886	0.0519753	1.45525		-0.0973448	0.907243	0.907243
N3	0.720873	0.233227	0.043996	0.00190337		0.720873	0.233227	0.0458994	1.56806		-0.027323	0.973047	0.973047
N6	0.788482	0.164022	0.0459242	0.00157158		0.788482	0.164022	0.0474958	1.70139	1.59901	0.0494627	1.05071	1.05071	0.993225
N6	0.726088	0.230578	0.0413528	0.00198056		0.726088	0.230578	0.0433334	1.57867		-0.0193748	0.980812	0.980812
N6	0.698478	0.250446	0.0467395	0.00433641		0.698478	0.250446	0.0510759	1.52319		-0.0570555	0.944542	0.944542
N6	0.702516	0.258933	0.0355233	0.00302812		0.702516	0.258933	0.0385514	1.53271		-0.0429648	0.957945	0.957945
N6	0.810437	0.158186	0.0310074	0.000369613		0.810437	0.158186	0.031377	1.74674		0.086929	1.09082	1.09082
N6	0.692853	0.250536	0.0548616	0.00174927		0.692853	0.250536	0.0566109	1.51139		-0.0677131	0.934529	0.934529
N9	0.749706	0.210791	0.0378962	0.00160635		0.749706	0.210791	0.0395025	1.62579	1.58055	0.0107544	1.01081	1.01081	0.980671
N9	0.80596	0.155802	0.0366775	0.00156068		0.80596	0.155802	0.0382382	1.73705		0.076597	1.07961	1.07961
N9	0.651808	0.28662	0.0597424	0.00183002		0.651808	0.28662	0.0615724	1.42972		-0.118797	0.887988	0.887988
N9	0.63928	0.292307	0.0663659	0.00204685		0.63928	0.292307	0.0684127	1.40413		-0.1384	0.87075	0.87075
N9	0.824044	0.139479	0.0353049	0.00117139		0.824044	0.139479	0.0364763	1.77298		0.0987848	1.10383	1.10383
N9	0.694456	0.241512	0.0619735	0.00205856		0.694456	0.241512	0.0640321	1.51364		-0.0714542	0.931039	0.931039

## Sheet: SOC
treatment	SOC in macro-aggregate（mg/g）	SOC in micro-aggregate（mg/g）	SOC in clay-silt（mg/g）	bulk soil SOC（mg/g)
N0	11.6146	7.17476	8.27695	13.2984
N0	8.0468	6.48765	6.52623	6.3924
N0	9.17115	8.97466	7.17797	7.79754
N0	10.4268	9.38379	7.62825	8.86883
N0	9.93773	9.89732	7.55608	8.98064
N0	11.409	7.88694	6.22748	12.8647
N3	18.1252	14.5287	13.0287	17.1313
N3	23.5768	16.5841	12.2381	21.0898
N3	13.3472	13.9692	8.78653	14.6881
N3	17.3665	14.1823	11.0126	11.3661
N3	15.5053	16.3781	10.1746	14.7768
N3	16.1107	14.4272	9.70513	14.6876
N6	21.1623	22.2006	13.9718	20.7147
N6	21.9042	18.3253	12.5943	19.7446
N6	19.0607	14.5745	10.6495	14.2444
N6	18.9227	14.9382	9.712	19.4884
N6	13.7377	13.2973	9.50654	14.1608
N6	14.0348	12.0279	9.08579	13.1393
N9	17.9058	16.3687	11.0316	13.9758
N9	18.3213	15.7201	12.1443	14.0609
N9	17.6398	14.4383	11.2251	14.932
N9	13.537	11.6855	9.19956	10.3631
N9	16.4747	13.6595	10.8184	14.5326
N9	24.0109	15.504	12.1993	18.0163
